1 **Microbial phylogenetic relatedness links to distinct successional patterns of bacterial and**  
2 **fungal communities**

3 Qiang Lin<sup>a,e\*</sup>, Francisco Dini-Andreote<sup>b,c</sup>, Travis B. Meador<sup>a</sup>, Roey Angel<sup>a</sup>, Lenka  
4 Meszárošová<sup>d</sup>, Petr Heděnc<sup>f,g</sup>, Lingjuan Li<sup>a</sup>, Petr Baldrian<sup>d</sup>, Jan Frouz<sup>a,c\*</sup>

5

6 **Running title:** Ecological succession of bacteria and fungi

7 <sup>a</sup> Biology Centre of the Czech Academy of Sciences, Institute of Soil Biology & SoWa Research  
8 Infrastructure, Na Sádkách 7, CZ, 37005, České Budějovice, Czech Republic

9 <sup>b</sup> Department of Plant Science, The Pennsylvania State University, University Park, PA, USA

10 <sup>c</sup> Huck Institutes of the Life Sciences, The Pennsylvania State University, University Park, PA,  
11 USA

12 <sup>d</sup> Laboratory of Environmental Microbiology, Institute of Microbiology of the Czech Academy  
13 of Sciences, Vídeňská 1083, 14220 Praha 4, Czech Republic

14 <sup>e</sup> Institute for environmental studies, Faculty of Science, Charles University, Benátská 2, 12800,  
15 Praha 2, Czech Republic

16 <sup>f</sup> Department of Geosciences and Natural Resource Management, Faculty of Science,  
17 University of Copenhagen, Rolighedsvej 23, 1958 Frederiksberg C, Denmark

18 <sup>g</sup> Engineering Research Center of Soil Remediation of Fujian Province University, College of  
19 Resources and Environment, Fujian Agriculture and Forestry University, Fuzhou 350002,  
20 China

21 **\*Corresponding author:** Qiang Lin, E-mail: [qiangl2019@gmail.com](mailto:qiangl2019@gmail.com) and Jan Frouz, E-mail:

22 [jan.frouz@natur.cuni.cz](mailto:jan.frouz@natur.cuni.cz)

23 **Abstract**

24 Development of soil microbial communities along ecological succession is crucial for  
25 ecosystem recovery and maintenance. However, mechanisms mediating microbial community  
26 dynamics and co-occurrence patterns along ecological succession remain unclear. Here, we  
27 explored community dynamics and taxa co-occurrence patterns in bacterial and fungal  
28 communities across a well-established chronosequence of post-mining lands spanning 54 years  
29 of recovery. Meanwhile, by synthesizing previous studies and ecological theories, we devised  
30 two conceptual models that integrate microbial phylogeny with patterns in community  
31 dynamics and in taxa co-occurrence. We further tested these models by using empirical data.  
32 At early successional stages, bacterial community structures became increasingly  
33 phylogenetically clustered with soil age, which was co-determined by the environmental  
34 selection from soil vegetation cover and by heterogeneous responses of less phylogenetically  
35 similar bacteria to the increasing resource availability along succession. At later successional  
36 stages, bacterial community phylogenetic structures displayed progressively lower variability.  
37 The fungal community phylogenetic structures varied relatively less and were independent of  
38 soil age, soil properties and vegetation cover, which was attributed to the dominance of  
39 stochastic processes in community turnover along succession. Network analysis revealed a  
40 decrease in bacterial co-occurrence complexity along succession, which aligned with a decrease  
41 in average pairwise phylogenetic distances between co-occurring bacteria. These patterns  
42 together implied a decrease in potential bacterial cooperation that was probably mediated by  
43 increasing resource availability along succession. The increased complexity of fungal co-  
44 occurrence along succession was independent of phylogenetic distances between co-occurring

45 fungi. This study provides new sights into ecological mechanisms underlying bacterial and

46 fungal community succession.

47

48 **Keywords:** soil bacteria and fungi, ecological succession, community assembly, phylogenetic

49 relatedness, co-occurrence, post-mining lands

## 50 **1. Introduction**

51 Elucidating the co-development of soil microbiomes and the ecosystem that hosts them is  
52 crucial for understanding ecosystem functioning, recovery and maintenance (Bardgett and van  
53 der Putten, 2014; Dini-Andreote et al., 2014; Bahram et al., 2018). Therefore, studying natural  
54 development of post-mining lands provides a unique opportunity to advance knowledge on the  
55 mechanisms underlying soil microbiome development along with *de novo* ecosystem recovery,  
56 as strip-mining activities often degrade existing ecosystems to an almost primordial stage.

57 Elucidating soil microbial community dynamics and microbial taxa co-occurrence patterns  
58 along ecological succession could provide important clues to understand successional patterns  
59 of microbial communities (Brown and Jumpponen, 2014; Dini-Andreote et al., 2014; Harantová  
60 et al., 2017; Morriën et al., 2017), whereas addressing either of them remains challenging  
61 (Additional file 1: Fig. S1). Besides environmental selection effects, the niche characteristics  
62 of the initial community could also affect community dynamics (i.e., the transition from an  
63 initial community to a later community), as community niche characteristics determine how the  
64 community respond to environmental selection/disturbance. For example, a few studies have  
65 revealed “legacy effects” based on the finding that initial microbial communities differing in  
66 niche characteristics, subsequently subjected to the identical environmental selection, finally  
67 transitioned to different community assemblages (Evans and Wallenstein, 2014; Banerjee et al.,  
68 2016a). However, it remains challenging to understand how the niche characteristics of the  
69 initial community would affect community dynamics (Additional file 1: Fig. S1a).

70 Due to the high complexity of soil microbiomes, direct evaluation of their niche  
71 characteristics is not technically feasible. Instead, community phylogenetic structures could

72 provide clues for community niche characteristics (Webb et al., 2002). As such, a  
73 phylogenetically clustered community (species in this community are more closely related than  
74 null model expectation (Stegen et al., 2012)) consists of species with similar niches; an  
75 overdispersed community (species in this community are more distantly related than null model  
76 expectation (Stegen et al., 2012)) consists of species with distinct niches (Webb et al., 2002).  
77 Here, to address the challenge in elucidating community dynamics (Additional file 1: Fig. S1a),  
78 we devised a conceptual model (Fig. 1a) to describe how the phylogenetic structure of the initial  
79 community will affect the later community structure, namely community dynamics. In our  
80 model (Fig. 1a), if the initial community is phylogenetically overdispersed (nearest taxon index  
81 (NTI) < -2 (Stegen et al., 2012)), this community is predicted to show heterogeneous responses  
82 to the environmental selection. In this case, the later community is expected to become more  
83 phylogenetically clustered than the initial community. For example, Tripathi et al. found that  
84 under pH selection, the phylogenetically overdispersed (or less phylogenetically clustered)  
85 community became more phylogenetically clustered (Tripathi et al., 2018). This happens  
86 because taxa performed heterogeneous responses that well-adapted taxa became predominant  
87 while maladapted taxa became rare or were excluded in the later community. These  
88 predominant taxa are probably closely related, as they show similar adaptations to pH selection  
89 (Webb et al., 2002), thus resulting in a more phylogenetic clustered community. In contrast, if  
90 the initial community is phylogenetically clustered (nearest taxon index (NTI) > 2 (Stegen et  
91 al., 2012)), this community is predicted to show a homogeneous response to the environmental  
92 selection (Fig. 1a), so that the phylogenetic structure of the later community is expected to keep  
93 relatively stable as the initial community. This happens because taxa perform heterogeneous

94 responses that taxa in the initial community are closely related and thus are presumed to develop  
95 similarly in response to the environmental selection (Webb et al., 2002). Taken together, our  
96 model (Fig. 1a) conceptualizes another factor (i.e., the phylogenetic structure of the initial  
97 community) underlying community dynamics along ecological succession.

98       Although microbial taxa co-occurrence patterns are important for understanding microbial  
99 community assembly along ecological succession (Dini-Andreote et al., 2014; Morriën et al.,  
100 2017), ecologically explaining taxa co-occurrence patterns is challenging (Additional file 1:  
101 Fig. S1b). For example, taxa co-presence (positive correlations between taxa in the network)  
102 could imply two distinct ecological inferences: 1) potential cooperation for  
103 survival/development across taxa with distinct niches, or 2) similar environmental preferences  
104 across taxa with similar niches (Barberan et al., 2012; Deng et al., 2012). Taxa co-exclusion  
105 (negative correlations between taxa) could also imply two distinct ecological inferences: 1)  
106 potential competition across taxa with similar/overlapped niches, or 2) distinct environmental  
107 preferences across taxa with distinct niches (Barberan et al., 2012; Deng et al., 2012)  
108 (Additional file 1: Fig. S1b). Therefore, it is challenging to differentiate the ecological  
109 inferences derived from taxa co-occurrence patterns and thus hinders the understanding of  
110 ecological relationships among taxa (Additional file 1: Fig. S1b).

111       Remarkably, all ecological inferences derived from microbial co-occurrence patterns are  
112 tightly linked to species niches, so the phylogenetic relatedness among co-occurring species  
113 can help to differentiate the ecological inferences derived from a specific co-occurrence pattern,  
114 based on the assumption of phylogenetic niche conservatism (Webb et al., 2002). Here, to  
115 address the challenge in ecologically elucidating taxa co-occurrence patterns (Additional file 1:

116 Fig. S1b), we devised a conceptual model (Fig. 1b) that integrates phylogenetic relatedness  
117 between the co-occurring taxa with taxa co-occurrence patterns to differentiate ecological  
118 inferences from microbial co-occurrence. In the model (Fig. 1b), in scenario (1): taxa co-  
119 presence (positive correlations between taxa in the network) implies similar environmental  
120 preferences between the co-present taxa, if the co-present taxa are closely related (evaluated by  
121 the phylogenetic distance between the co-present taxa), because similar environmental  
122 preferences are usually found among closely related taxa (Webb et al., 2002); in scenario (2):  
123 taxa co-presence implies potential cooperation between the co-present taxa, if the co-present  
124 taxa are distantly related, because functionally complementary cooperation tends to establish  
125 between distantly related taxa (Morris et al., 2013; Zelezniak et al., 2015); in scenario (3): taxa  
126 co-exclusion (negative correlations between taxa in the network) implies potential competition  
127 between the co-excluding taxa, if the co-excluding taxa are closely related, because competition  
128 tends to occur between closely related taxa that occupy similar/overlapped niches (Hibbing et  
129 al., 2010); in scenario (4): taxa co-exclusion implies distinct environmental preferences  
130 between the co-excluding taxa, if the co-excluding taxa are distantly related, because distinct  
131 environmental preferences are usually found among distantly related taxa (Webb et al., 2002).

132 In this study, we focused on two major components of soil microbiomes (bacterial and  
133 fungal communities) and utilized phylogenetic information to disentangle the interplay of  
134 ecological processes underlying microbial community dynamics and co-occurrence patterns  
135 along ecological succession on post-mining lands. We addressed three main questions: (i) To  
136 what extent do the phylogenetic structures of bacterial and fungal communities change along  
137 succession? (ii) What are the relative influences of distinct ecological processes that mediate



138 bacterial and fungal community dynamics? (*iii*) How do bacterial and fungal co-occurrence  
139 patterns change along ecological succession, and why?

140

## 141 **2. Materials and methods**

### 142 **2.1. Data collection**

143 A well-established soil chronosequence from the lignite mining district near Sokolov in the  
144 Czech Republic (Frouz et al., 2001; Frouz and Nováková, 2005; Mudrak et al., 2016) was used  
145 to investigate the patterns of soil succession and recovery. The chronosequence and other  
146 background information in this area were provided by Sokolovská Uhelná mining company.  
147 The chronosequence was further validated using historical aerial photography and additional  
148 independent methods (Frouz, 2013). In this area, the mean annual temperature is 6.8 °C, the  
149 mean annual precipitation is 650 mm and the altitude is ~550 m a.s.l (Frouz et al., 2001). This  
150 chronosequence spans 54 years of ecosystem development from bare overburden of alkaline  
151 Miocene clay via herbs, grasses, goat willow shrubs to young forests dominated by birch and  
152 aspen (Mudrak et al., 2016; Harantová et al., 2017). A total of four distinct chronosequence  
153 sites (i.e., Sites I, II, III and IV) were sampled in triplicate at three time-points (in the end of  
154 May in 2006 (2008 only for the Site I), 2010 and 2015) (Additional file 1: Table S1) (see  
155 (Harantová et al., 2017) for additional details). The aboveground vegetation was surveyed as  
156 previously described (Harantová et al., 2017). Soil samples were subjected to total DNA  
157 extraction (Additional file 2: S1), quantification of microbial biomass, and characterization of  
158 physicochemical properties (i.e., total nitrogen, organic carbon and pH), as previously  
159 described (Sagova-Mareckova et al., 2008; Harantová et al., 2017). The primer sets 515F/806R

160 (Caporaso et al., 2012) and nu-SSU-0817/nu-SSU-1196 (Borneman and Hartin, 2000) were  
161 used to amplify the bacterial 16S rRNA gene and the fungal 18S rRNA gene, respectively, as  
162 previously described (Zifcakova et al., 2016; Navrátilová et al., 2019). PCR products were  
163 purified and sequenced on an Illumina MiSeq platform in the Laboratory of Environmental  
164 Microbiology, Institute of Microbiology of the Czech Academy of Sciences.

165

## 166 **2.2. Data analysis**

167 Amplicon sequences were sorted according to their unique barcodes and trimmed for quality  
168 (sequences containing ambiguous characters, with read length < 200bp, or with quality score <  
169 15 were removed) (Edgar and Flyvbjerg, 2015), followed by chimera removal (Edgar et al.,  
170 2011). Sequences were clustered at 97% and 98.5% similarities, into operational taxonomic  
171 units (OTUs), for bacteria and fungi, respectively (Li and Godzik, 2006). Taxonomic  
172 assignments of bacterial sequences were performed using the Greengenes database (version  
173 13\_8) (DeSantis et al., 2006). Each fungal OTU was assigned to its closest genus using the  
174 Genbank database. Singletons, non-bacterial and non-fungal sequences were removed, and the  
175 OTU tables were rarefied to 7942 sequences per sample (bacteria) and 1431 sequences per  
176 sample (fungi).

177 Representative sequences of fungal and bacterial OTUs were aligned with PyNAST  
178 (Caporaso et al., 2010), referring to the SILVA alignment version 108 ([https://www.arb-  
179 silva.de/download/archive/qiime/](https://www.arb-silva.de/download/archive/qiime/)), and the Greengenes core set alignment  
180 ([http://greengenes.lbl.gov/Download/Sequence\\_Data/Fasta\\_data\\_files/](http://greengenes.lbl.gov/Download/Sequence_Data/Fasta_data_files/)). The high-quality  
181 alignments of bacterial and fungal representative sequences were used to construct

182 phylogenetic trees with FastTree, respectively (Price et al., 2009). To evaluate the phylogenetic  
183 relatedness between OTUs, the phylogenetic distance of pairwise OTUs was determined using  
184 the function *cophenetic* in the R (v. 4.0.2) package ‘stats’ (v. 4.0.2) based on the phylogenetic  
185 tree. To evaluate the niche differences between OTUs, the niche distance of pairwise OTUs for  
186 all measured environmental variables (aboveground vegetation and soil properties) was  
187 determined as previously described (Stegen et al., 2012). To test the phylogenetic signal, the  
188 function *mantel.correlog* (permutations = 999) in the R package ‘vegan’ (v. 2.5-6) was used to  
189 measure the Pearson’s correlation between OTU phylogenetic distances and OTU niche  
190 distances (Stegen et al., 2012). To evaluate the community phylogenetic structure, nearest taxon  
191 index (NTI) of microbial communities was calculated in the R package ‘picante’ (v.1.8.2) with  
192 the function *ses.mntd* (abundance.weighted = TRUE, null.model="taxa.labels", iterations =  
193 1000) with 999 randomization across all samples. NTI value > +2 indicates phylogenetic  
194 clustering (species in a local community are more closely related than null model expectation),  
195 whereas NTI value < -2 indicates phylogenetic overdispersion (species in a local community  
196 are more distantly related than null model expectation) (Table 1) (Stegen et al., 2012; Stegen et  
197 al., 2013). Mantel test was used to evaluate correlations between Euclidean distances of NTI  
198 values and vegetation cover, using the R package ‘vegan’. To estimate pairwise phylogenetic  
199 turnover between communities, Beta mean nearest taxon distance ( $\beta$ MNTD) was calculated  
200 using the function *comdistnt* (abundance.weighted = TRUE) in the R package ‘picante’.  $\beta$ -  
201 nearest taxon index ( $\beta$ NTI) was used to estimate the degree to which observed  $\beta$ MNTD deviates  
202 from the mean of the null distribution  $\beta$ MNTD, normalized by its standard deviation.  $\beta$ NTI was  
203 calculated based the phylogenetic null model (Additional file 2: S2) (Stegen et al., 2013; Stegen

204 et al., 2015).  $\beta$ NTI value  $< -2$  indicates that phylogenetic turnover is driven by homogeneous  
205 selection (significantly less turnover than null model expectation), whereas  $\beta$ NTI value  $> +2$   
206 indicates variable selection (significantly greater turnover than null model expectation) (Table  
207 1) (Stegen et al., 2013; Stegen et al., 2015).  $|\beta$ NTI|  $< 2$  indicates that phylogenetic turnover is  
208 not driven by deterministic processes (no significant differences between observed turnover  
209 and null model expectation) but by dispersal limitation, homogenizing dispersal, or  
210 undominated process (including ecological drift and other stochastic processes excluding  
211 dispersal) (Table 1) (Stegen et al., 2013; Stegen et al., 2015). In the scenario of  $|\beta$ NTI|  $< 2$ , to  
212 disentangle these ecological processes, the Bray-Curtis-based Raup-Crick metric ( $RC_{\text{bray}}$ ) was  
213 calculated with the modified approach by Stegen et al. (Stegen et al., 2013) from Chase et al.  
214 (Chase et al., 2011). Taken together, the relative importance of ecological processes to the  
215 phylogenetic turnover of microbial communities was evaluated following the previous method  
216 (Table 1) (Stegen et al., 2013; Stegen et al., 2015). In particular, in the scenario of  $|\beta$ NTI|  $< 2$ ,  
217 the percentages of  $RC_{\text{bray}} > +0.95$ ,  $RC_{\text{bray}} < -0.95$  and  $|RC_{\text{bray}}| < 0.95$  were used to quantify the  
218 relative importance of dispersal limitation, homogenizing dispersal and undominated process,  
219 respectively. The percentages of  $\beta$ NTI values  $> +2$  and  $< -2$  were used to quantify the relative  
220 importance of variable and homogeneous selection, respectively.

221 Based on these above analyses, we found large differences in vegetation cover, soil  
222 properties and microbial community turnover between the early successional stages (ES,  
223 including Site I and II) and the later successional stages (LS, including Site III and IV) (see the  
224 Result section). In this context, co-occurrence network analysis was performed separately on  
225 the data from ES and LS, to reveal microbial co-occurrence patterns along the succession. Two

226 network groups were constructed based on bacterial and fungal communities, respectively.  
227 OTUs with occurrence in more than three samples and average relative abundance  $> 0.1\%$  were  
228 selected in early (158 OTUs) and later (168 OTUs) successional stages for bacteria, and in early  
229 (83 OTUs) and later (78 OTUs) successional stages for fungi. Spearman correlations between  
230 two taxa with adjusted  $P$ -value (Benjamini and Hochberg, 1995)  $< 0.01$  and rho coefficient  $>$   
231  $0.7$  or  $< -0.7$  were considered statistically robust to indicate positive and negative co-  
232 occurrences, respectively (Barberan et al., 2012). FDR correction (Benjamini and Hochberg,  
233 1995) of  $P$ -values was conducted in R using the package ‘vegan’. The taxa involved in the  
234 network were designated as co-occurring taxa. A total of 999 Erdős-Rényi random networks  
235 (Erdős and Rényi, 1960) with the same number of nodes and edges as each correspondingly  
236 observed network were generated using the function *erdos.renyi.game* in the R package ‘igraph’  
237 (v. 1.2.6). The topological properties and visualizations of networks were performed using  
238 Gephi (<https://gephi.github.io/>). To evaluate the significance of differences in comparisons,  
239 Wilcoxon rank sum test and permutational multivariate analysis of variance (PERMANOVA)  
240 were conducted in R using the packages ‘stats’ and ‘vegan’. The regression analysis with the  
241 method of “loess” (Cleveland and Grosse, 1991) was conducted in R using the packages  
242 “ggplot2” (v. 3.3.2).

243

### 244 **3. Results**

#### 245 **3.1. Changes in environmental variables along the chronosequence**

246 Vegetation cover and soil properties significantly changed across the post-mining soil  
247 chronosequence, especially between the early successional stages (ES, including Site I and II)

248 and the later successional stages (LS, including Site III and IV), but no significant differences  
249 were found within ES (Site I *VS* Site II) or LS (Site III *VS* Site IV) (Additional file 1: Table S2  
250 and S3). In ES, the increase of vegetation cover with soil age was accompanied by the  
251 significant increase in biomass of bacteria and fungi (Additional file 1: Table S4). In LS, the  
252 sites were gradually covered by trees. The soil organic carbon and total nitrogen were  
253 significantly higher (ca. two-fold change,  $p < 0.01$ , by Wilcoxon rank sum test) in LS than those  
254 in ES, which was likely attributed to the greater vegetation cover at these mature soil stages  
255 (Additional file 1: Table S2). Soil pH showed an opposite pattern, gradually decreasing with  
256 soil age from 7.4 to 6.7.

257

### 258 **3.2. Phylogenetic structures and turnover of microbial communities across the** 259 **chronosequence**

260 All NTI values of bacterial communities across the chronosequence were greater than + 2 (Fig.  
261 2), indicating that bacterial community structures were more phylogenetically clustered than  
262 null model expectation (Stegen et al., 2012). Bacterial NTI values increased with soil age ( $p <$   
263  $0.05$ ) in ES, thereafter showing less variability in LS (Fig. 2). Bacterial NTI values were  
264 significantly positively correlated with vegetation cover but not with soil properties (Additional  
265 file 1: Table S5 and S6). Interestingly, bacterial NTI values showed significant positive  
266 correlations with bacterial biomass (based on both qPCR and PLFA results) only in ES  
267 (Additional file 1: Table S6). NTI values of most fungal communities were greater than + 2  
268 (Fig. 2), indicating that fungal community structures were phylogenetically clustered. Fungal  
269 NTI values did not significantly correlate with vegetation cover or fungal biomass ( $p > 0.05$ ),

270 but were only significantly positively correlated with soil pH in LS (Additional file 1: Table S5  
271 and S6).

272 Across short phylogenetic distances for both bacterial and fungal communities, significant  
273 positive correlations were found between OTU phylogenetic distances and OTU niche  
274 distances (Additional file 1: Fig. S2), indicating a significant phylogenetic signal. Thus,  
275 bacterial and fungal communities exhibited phylogenetic niche conservatism, supporting the  
276 use of phylogenetic information to derive ecological inferences (Losos, 2008; Stegen et al.,  
277 2013). With the combination of  $RC_{\text{bray}}$  and  $\beta\text{NTI}$ , we quantified the ecological processes  
278 governing the turnover of microbial community structures (Fig. 3), based on the criteria shown  
279 in Table 1. For the turnover of bacterial community structures, variable selection was stronger  
280 in ES (63.9 % at Site I and 69.4 % at Site II) than in LS (2.8 % at Site III and 38.9 % at Site  
281 IV), whereas homogeneous selection was stronger in LS (8.3 % at Site III and 30.6 % at Site  
282 IV) than in ES (0 % at Site I and 5.6 % at Site II). Across all successional stages (including the  
283 turnover between sites and within sites), the turnover of bacterial community structures was  
284 mainly driven by dispersal limitation and environmental selection (variable and homogeneous  
285 selection) (Fig. 3a). For the turnover of fungal community structures, variable selection was  
286 more important in LS (44.4 % at Site III and 52.8 % at Site IV) than in ES (25 % at Site I and  
287 2.7 % at Site II). Across all successional stages, the turnover of fungal community structures  
288 was largely driven by dispersal limitation, undominated processes and environmental selection  
289 (Fig. 3b).

290

### 291 **3.3. Microbial co-occurrence patterns along succession**

292 Owing to the large differences in vegetation cover, soil properties and microbial community  
293 turnover between ES and LS, we constructed networks separately based on data in ES and LS,  
294 to reveal the differences in microbial co-occurrence patterns across successional stages. Among  
295 the network topological properties, the observed “modularity” was greater than that in the  
296 corresponding Erdős-Rényi random networks (Additional file 1: Table S7), suggesting that  
297 observed networks had modular structures (Newman, 2006). Other topological properties such  
298 as ‘network diameter’ and ‘average path length’ in each observed network were different from  
299 those in the corresponding Erdős-Rényi random networks (Additional file 1: Table S7). These  
300 implied that all the observed networks were distinguishable from random networks.

301 All four networks were dominated by co-presence (positive connections) (Fig. 4 and  
302 Additional file 1: Table S7). In the bacterial networks, the nodes (OTUs) were mainly from the  
303 phyla Proteobacteria, Actinobacteria, Gemmatimonadetes and Bacteroidetes, and node number  
304 declined from ES to LS (Fig. 4). The node degree (number of connections to a node) that  
305 represents the connectedness of the network significantly declined from ES to LS (Fig. 5a). The  
306 network average degree (representing network complexity (Deng et al., 2012; Dini-Andreote  
307 et al., 2014)) and the number of total connections also declined from ES to LS (Additional file  
308 1: Fig. S3 and Table S7). Taken together, the signals of network average degree, node degree,  
309 node number, and connection number indicated a decrease in the network complexity from ES  
310 to LS. Notably, the decrease in the complexity was more obviously reflected in co-presence  
311 than in co-exclusion (negative connections) (Fig. 5a and Additional file 1: Fig. S3 and Table  
312 S7). However, in the fungal networks, an opposite pattern was observed, such that the network  
313 complexity increased from ES to LS (Fig. 4 and 5a, and Additional file 1: Fig. S3 and Table



314 S7).

315 Microbial co-occurrence is influenced by microbial niches and thus is usually tightly  
316 related to phylogenetic relatedness between co-occurring taxa (Fig. 1b) (Losos, 2008; Stegen  
317 et al., 2012). Therefore, the relationship between microbial co-occurrence patterns and  
318 corresponding pairwise phylogenetic distances (between co-occurring taxa) was evaluated (Fig.  
319 5b). Greater pairwise phylogenetic distances between two taxa correspond to greater  
320 phylogenetical difference between taxa. In bacterial networks, the average pairwise  
321 phylogenetic distances were greater ( $p < 0.01$ ) in ES than in LS (Fig. 5b). The differences in  
322 average pairwise phylogenetic distances between ES and LS were greater and had higher  
323 significance in bacterial co-presence than co-exclusion. For fungal communities, the average  
324 pairwise phylogenetic distances were not significantly different ( $p > 0.05$ ) between in ES and  
325 in LS, no matter in co-presence or co-exclusion (Fig. 5b). Collectively, the decreasing network  
326 complexity corresponded to the decreasing average pairwise phylogenetic distances in bacterial  
327 communities across the chronosequence, while there was no such corresponding relationship  
328 observed in fungal communities.

329 There were great variations in microbial co-occurrence patterns across the chronosequence,  
330 which was probably related to the turnover of these co-occurring microorganisms (that were  
331 involved in networks). Thus, we further evaluated different ecological processes determining  
332 the turnover of these co-occurring microorganisms. We found that dispersal limitation played  
333 a dominant role in the turnover of co-occurring bacterial communities, and dispersal limitation  
334 together with undominated process mainly governed the turnover of co-occurring fungal  
335 communities (Additional file 1: Fig. S4). Variable selection exerted a greater role in the

336 turnover of co-occurring bacterial communities in ES than in LS, whereas an opposite pattern  
337 was observed in fungi.

338

#### 339 **4. Discussion**

##### 340 **4.1. Ecological processes driving microbial community succession**

341 The extent of phylogenetic clustering of bacterial communities significantly increased with soil  
342 age in ES (Fig. 2), indicating the increasing convergence of bacterial taxa niches. Shifts in  
343 microbial community phylogenetic structures are usually related to environmental variations  
344 (Stegen et al., 2012; Brown and Jumpponen, 2014). Changes in environmental properties in ES  
345 (Additional file 1: Table S2) yielded high environmental heterogeneity, which was further  
346 validated by major contributions of variable selection to the turnover of bacterial community  
347 structures in ES (Fig. 3a), because variable selection could indicate environmental  
348 heterogeneity (Dini-Andreote et al., 2015; Stegen et al., 2015). The high environmental  
349 heterogeneity in ES was probably the cause of great dynamics of bacterial community  
350 phylogenetic structures. Additionally, significantly positive correlations between bacterial NTI  
351 values with vegetation cover in ES (Additional file 1: Table S5) further suggest that  
352 environmental selection determined phylogenetic structures of bacterial communities in ES.

353 Low soil nutrient availability has been reported to enhance phylogenetic clustering of  
354 bacterial communities (Feng et al., 2017), which is not consistent with the finding in this study.  
355 In ES, the gradually increasing vegetation cover from barren soil via grassland to forest  
356 (Additional file 1: Table S2) likely account for the increasing amounts of rhizodeposits and  
357 litter, thereby enhancing soil nutrient availability (Harantová et al., 2017). This notion is

358 supported by the increased biomass of bacteria and fungi in ES. Remarkably, the substantial  
359 increase of bacterial biomass was accompanied by the increase of bacterial community  
360 phylogenetic clustering in ES (Additional file 1: Table S6), which can be explained by taxa  
361 heterogeneous responses in our model (Fig. 1a). Specifically, the initial bacterial communities  
362 in ES were less phylogenetically clustered (Fig. 2), so the nutrient acquisition strategies among  
363 bacterial taxa were presumably less similar (Webb et al., 2002). With progressive increments  
364 in nutrient availability along the chronosequence, bacterial taxa performed heterogeneous  
365 responses that they substantially expanded their populations over time, with different nutrient  
366 acquisition strategies. This notion is supported by the fact that relative abundances of different  
367 bacterial genera increased at different rates with soil age in ES (Harantová et al., 2017).  
368 Therefore, the substantial but uneven increase of biomass across bacterial taxa probably  
369 resulted in subsequent predominance of some taxa and thereby increased phylogenetic  
370 clustering of bacterial communities in ES. In prior studies, the increasing phylogenetic  
371 clustering of microbial communities was also found to align with the increasing predominance  
372 of some taxa in the community subjected to environmental selection (Yan et al., 2016; Wang et  
373 al., 2017). This can be explained by that predominant taxa under the similar environmental  
374 selection are likely closely-related (Webb et al., 2002), thus resulting in a phylogenetically  
375 clustered community. This explanation is supported by evidences that the predominance of  
376 well-adapted taxa to pH selection made the community phylogenetically clustered (Tripathi et  
377 al., 2018). These examples further prove our inference that less phylogenetically clustered  
378 communities caused taxa heterogeneous responses to the increment in nutrient availability and  
379 thus co-determined the increasing phylogenetic clustering of bacterial communities with soil

380 age in ES, thereby supporting our conceptual model (Fig. 1a). As succession proceeded,  
381 environmental stability and the buffering capacity of soil progressively increased (Dini-  
382 Andreote et al., 2014), which probably contributed to the relative stability (less variability) of  
383 bacterial community phylogenetic structures in LS. Meanwhile, the significant correlations  
384 between bacterial NTI values and vegetation cover in LS indicated that high forest cover  
385 probably resulted in homogeneous selection and directly or indirectly contributed to the relative  
386 stability of bacterial community phylogenetic structures. Additionally, bacterial homogeneous  
387 responses indicated by highly phylogenetic clustering of the bacterial community probably (at  
388 least partially) contributed to the relative stability of bacterial community phylogenetic  
389 structures in LS.

390 In ES, the extent of phylogenetic clustering of fungal communities remained relatively  
391 stable (less variable) with soil age, despite the increase in fungal biomass. This is consistent  
392 with few changes in the relative abundances of most fungal genera across soil ages in ES  
393 (Harantová et al., 2017), thus resulting in the relatively low level of community phylogenetic  
394 turnover. Besides, the dynamics of fungal community phylogenetic structures in ES were also  
395 attributed to the dominance of stochastic processes (e.g., undominated process and dispersal  
396 limitation) in community phylogenetic turnover (Fig. 3b). Additionally, neither vegetation  
397 cover nor soil properties significantly correlated with fungal NTI values in ES, which further  
398 endorses the dominance of stochastic processes in the turnover of fungal community  
399 phylogenetic structures.

400 The relative importance of variable selection in determining fungal community dynamics  
401 increased from ES to LS (Fig. 3b), which is not in agreement with other studies where

402 deterministic processes progressively decreased (Tian et al., 2017) or remained unchanged  
403 (Brown and Jumpponen, 2015) along successional gradients on glacier forefields. This  
404 disagreement was likely due to distinct initial conditions and environmental backgrounds of  
405 succession. Soil pH significantly correlated with fungal NTI values in LS. Therefore, the  
406 stronger variable selection on fungal community dynamics in LS was probably attributed to  
407 soil pH as well as the increased vegetation cover, which is known to at least partially influence  
408 fungal communities (Urbanova et al., 2015). Despite the stronger variable selection in LS,  
409 fungal community phylogenetic structures did not significantly change with soil age (Fig. 2).  
410 This might be explained by important roles of undominated process and dispersal limitation in  
411 determining fungal community dynamics (Fig. 3b). Interestingly, in comparison to the  
412 ecological processes that determined bacterial community dynamics, we found higher  
413 proportions of undominated process driving fungal community dynamics within each site as  
414 well as across all sites (Fig. 3). This difference probably explains the distinct dynamics of  
415 bacterial and fungal community phylogenetic structures along succession. Dispersal limitation  
416 refers to the restriction of taxa movement to and/or establishment in a new location (Martiny et  
417 al., 2011; Hanson et al., 2012). In this study, the sampling within a site was conducted in the  
418 same geocoordinate with different years (Additional file 1: Table S1). In this context, we  
419 assumed that the effect of geographic distance within a site can be neglected, so dispersal  
420 limitation (in this case) within each site (Fig. 3) may rather be attributed to the restriction of the  
421 continuous establishment of taxa across the chronosequence. Although here we categorized  
422 dispersal limitation into stochastic processes, dispersal limitation could be partly caused by  
423 deterministic factors (e.g., habitat features that probably changed across the chronosequence in

424 this study) (Hanson et al., 2012). Therefore, the relatively higher proportional influence of  
425 dispersal limitation on the dynamics of the bacterial versus fungal communities across all sites  
426 (Fig. 3) suggested that bacterial communities were more responsive to the ecological succession  
427 than fungal communities.

428

#### 429 **4.2. Mechanisms underlying microbial co-occurrence patterns along succession**

430 Bacterial co-occurrence exhibited decreasing complexity along succession, while the  
431 complexity of fungal co-occurrence showed the opposite pattern (Fig. 4 and 5a, and Additional  
432 file 1: Fig. S3). A similar development of bacterial co-occurrence was reported in a salt marsh  
433 chronosequence, where the higher co-occurrence complexity at initial successional stages was  
434 attributed to the higher temporal turnover of bacterial communities (Dini-Andreote et al., 2014).  
435 Analogously, in this study, high variability of bacterial community phylogenetic structures (Fig.  
436 2) and high community temporal turnover (Additional file 1: Fig. S5) probably underlay the  
437 high complexity of bacterial co-occurrence in ES. Moreover, the importance of variable  
438 selection in the turnover of bacterial co-occurring communities and whole communities (Fig. 3  
439 and Additional file 1: Fig. S4) decreased together with bacterial co-occurrence complexity  
440 along succession. Because variable selection probably indicates environmental heterogeneity  
441 (Dini-Andreote et al., 2015; Stegen et al., 2015), we speculate that the greater environmental  
442 heterogeneity contributed to the higher complexity of bacterial co-occurrence in ES.

443 When linking bacterial co-occurrence patterns to their phylogeny, we found that the  
444 decreasing complexity of bacterial co-presence from ES to LS aligned with the general increase  
445 of phylogenetic clustering of bacterial communities (Fig. 2), and remarkably with the decrease

446 of average pairwise phylogenetic distances between co-present taxa from ES to LS (Fig. 5b).  
447 That is, bacterial co-presence complexity decreased as the co-present taxa became more  
448 phylogenetically similar along succession. Based on our model (Fig. 1b), in scenario (1) where  
449 taxa co-presence bases on the similar environmental preference between the taxa: if the  
450 decrease of bacterial co-presence complexity along succession was attributed to the decreased  
451 similarity in environmental preference between the co-present bacterial taxa, the corresponding  
452 average pairwise phylogenetic distances between co-present taxa were expected to increase.  
453 This would occur because similar environmental preference favors phylogenetically similar  
454 (closely related) taxa (Webb et al., 2002; Tripathi et al., 2018). In scenario (2) where taxa co-  
455 presence bases on potential cooperation among the taxa: if the decrease of bacterial co-presence  
456 complexity along succession was attributed to the decreasing potential cooperation between  
457 distantly related bacteria, the corresponding average pairwise phylogenetic distances between  
458 co-present taxa were expected to decrease. This would occur because cooperation tends to be  
459 established based on metabolic dependencies between distantly related species whose niches  
460 are less overlapped (Morris et al., 2013; Zelezniak et al., 2015). In light of these concepts, only  
461 the scenario 2 was in agreement with our results, thus indicating that bacterial co-presence was  
462 likely an indication of potential cooperation across taxa. Interestingly, this inference, in turn,  
463 suggests the tight relationship between potential bacterial interactions and their corresponding  
464 phylogenetic relatedness in the natural environment. Most microbial interactions, regardless of  
465 cooperation or competition, are mostly established by nutrient demand (Hibbing et al., 2010;  
466 Morris et al., 2013). Nutrient addition was reported to substantially alter potential microbial  
467 interactions (Banerjee et al., 2016b), and high bacterial co-occurrence complexity has been

468 observed in barren soils (Dini-Andreote et al., 2014; Feng et al., 2017). Low nutrient availability  
469 has been suggested to push the exchange of metabolites and nutrients between species for  
470 survival (Zelezniak et al., 2015; Morriën et al., 2017). Therefore, in this study, low nutrient  
471 availability in ES probably strengthened the potential cooperation between functionally distinct  
472 bacteria, which resulted in the relatively higher complexity of bacterial co-presence.

473 Bacterial co-exclusion can be attributed to potential competition or distinct environmental  
474 preferences between co-excluding taxa (Fig. 1b; scenarios 3 and 4). If the decreasing  
475 complexity of bacterial co-exclusion from ES to LS (Additional file 1: Fig. S3 and Table S7)  
476 indicated the decreasing potential in bacterial competition, the corresponding average pairwise  
477 phylogenetic distances between co-excluding taxa were expected to increase, because  
478 competition is more prone to occur among phylogenetically similar taxa that occupy a similar  
479 niche (Webb et al., 2002; Violle et al., 2011; Stegen et al., 2012). However, this scenario  
480 conflicted with our observations (Fig. 5b). If the decreasing complexity of bacterial co-  
481 exclusion from ES to LS indicated the decreasing differences in environmental preferences  
482 between co-excluding taxa, the corresponding average pairwise phylogenetic distances  
483 between co-excluding taxa were expected to decrease, which coincided with our observations  
484 (Fig. 5b). This inference was further supported by the increase of phylogenetic clustering of  
485 bacterial communities from ES to LS (Fig. 2).

486 In contrast to bacterial community development, high turnover rates of fungal  
487 communities (Additional file 1: Fig. S5) did not result in high network complexity in ES.  
488 However, the higher environmental heterogeneity inferred by the higher proportional influence  
489 of variable selection on fungal community turnover (Fig. 3b), coincided with the higher



490 complexity of fungal co-occurrence in LS than in ES (Fig.4 and 5a and Additional file 1: Fig.  
491 S2). This indicates that the higher environmental heterogeneity may contribute to the higher  
492 complexity for fungal co-occurrence in LS. The higher environmental heterogeneity of fungal  
493 communities might be due to the increased vegetation cover in LS, as discussed in section 4.1.  
494 Interestingly, although fungal co-occurrence complexity increased along succession, the  
495 corresponding average pairwise phylogenetic distances between taxa in co-occurrence were not  
496 significantly different between in ES and in LS (Fig. 5). Thus, we speculate that fungal co-  
497 occurrence patterns along succession were unlikely related to their phylogeny. The less  
498 difference in average phylogenetic distances of co-occurring fungi between in ES and in LS  
499 was likely a result of the highly similar phylogeny of regional species, which was reflected in  
500 the flat dynamics of fungal phylogenetic structures along succession.

501

## 502 **5. Conclusions and implications**

503 This study shows that bacterial community phylogenetic structures were more responsive than  
504 fungal community phylogenetic structures to environmental gradients along the soil primary  
505 succession, which was attributed to stronger deterministic effects on bacterial than fungal  
506 community phylogenetic turnover. Significant changes in bacterial phylogenetic structures only  
507 occurred at early successional stages, and aligned with substantial increase of bacterial biomass.  
508 This implies that bacterial taxa niches and bacteria-dependent functions in the ecosystem  
509 changed mainly at early successional stages, as the expansion of communities. Both bacterial  
510 and fungal co-occurrence patterns significantly varied along succession, but only the former  
511 aligned with phylogenetic relatedness between co-occurring taxa, thereby implying potential

512 bacterial cooperation based on our conceptual models. Thus, bacterial co-occurrence patterns  
513 along soil primary succession were phylogeny-associated. Taken together, our results boost  
514 understanding of ecological processes underlying microbial community development along soil  
515 primary succession. Our conceptual models help to address two key fundamental challenges in  
516 microbial community assembly and have broad application, as the two challenges exist not only  
517 in soil ecosystems but also in other various ecosystems.

518

### 519 **Acknowledgements**

520 We thank Sokolovská Uhelná mining company for providing research permits and background  
521 data about the sites.

522

### 523 **Author's contributions**

524 QL analyzed the data and wrote the manuscript. QL, FDA, TBM, RA, PH, LJJ and LM revised  
525 the manuscript. LM performed experimental works. JF and PB conceived the study and revised  
526 the manuscript. All authors read the manuscript and approved the final draft.

527

### 528 **Funding**

529 This study was supported by grant of Ministry of Education Youth and Sport of the Czech  
530 Republic LM2015075 and EF16\_013/0001782.

531

### 532 **Data Accessibility**

533 The original sequencing data are available at public database (<http://metagenomics.anl.gov/>)

534 with dataset number 4741652.3 for bacteria and 4827823.3 for fungi.

535

### 536 **Ethics approval and consent to participate**

537 Not applicable

538

### 539 **Competing interest**

540 Authors declare that they have no competing interests.

541

### 542 **Appendices**

543 Supplementary information is available at ##.

544

545

### 546 **References**

547 Bahram, M., Hildebrand, F., Forslund, S.K., Anderson, J.L., Soudzilovskaia, N.A., Bodegom, P.M.,  
548 Bengtsson-Palme, J., Anslan, S., Coelho, L.P., Harend, H., Huerta-Cepas, J., Medema, M.H.,  
549 Maltz, M.R., Mundra, S., Olsson, P.A., Pent, M., Polme, S., Sunagawa, S., Ryberg, M., Tedersoo,  
550 L., Bork, P. (2018). Structure and function of the global topsoil microbiome. *Nature*, 560(7717),  
551 233-237.

552 Banerjee, S., Helgason, B., Wang, L., Winsley, T., Ferrari, B.C., Siciliano, S.D. (2016a). Legacy effects of  
553 soil moisture on microbial community structure and N<sub>2</sub>O emissions. *Soil Biology and*  
554 *Biochemistry*, 95(40-50).

555 Banerjee, S., Kirkby, C.A., Schmutter, D., Bissett, A., Kirkegaard, J.A., Richardson, A.E. (2016b). Network  
556 analysis reveals functional redundancy and keystone taxa amongst bacterial and fungal  
557 communities during organic matter decomposition in an arable soil. *Soil Biology and*  
558 *Biochemistry*, 97(188-198).

559 Barberan, A., Bates, S.T., Casamayor, E.O., Fierer, N. (2012). Using network analysis to explore co-  
560 occurrence patterns in soil microbial communities. *The ISME Journal*, 6(2), 343-351.

561 Bardgett, R.D., van der Putten, W.H. (2014). Belowground biodiversity and ecosystem functioning.  
562 *Nature*, 515(7528), 505-511.

563 Benjamini, Y., Hochberg, Y. (1995). Controlling the false discovery rate: a practical and powerful  
564 approach to multiple testing. *Journal of the Royal Statistical Society: Series B*, 57(1), 289-300.

- 565 Borneman, J., Hartin, R.J. (2000). PCR primers that amplify fungal rRNA genes from environmental  
566 samples. *Applied Environmental Microbiology*, 66(10), 4356-4360.
- 567 Brown, S.P., Jumpponen, A. (2014). Contrasting primary successional trajectories of fungi and bacteria  
568 in retreating glacier soils. *Molecular Ecology*, 23(2), 481-497.
- 569 Brown, S.P., Jumpponen, A. (2015). Phylogenetic diversity analyses reveal disparity between fungal and  
570 bacterial communities during microbial primary succession. *Soil Biology and Biochemistry*,  
571 89(52-60).
- 572 Caporaso, J.G., Bittinger, K., Bushman, F.D., DeSantis, T.Z., Andersen, G.L., Knight, R. (2010). PyNAST: a  
573 flexible tool for aligning sequences to a template alignment. *Bioinformatics*, 26(2), 266-267.
- 574 Caporaso, J.G., Lauber, C.L., Walters, W.A., Berg-Lyons, D., Huntley, J., Fierer, N., Owens, S.M., Betley, J.,  
575 Fraser, L., Bauer, M., Gormley, N., Gilbert, J.A., Smith, G., Knight, R. (2012). Ultra-high-  
576 throughput microbial community analysis on the Illumina HiSeq and MiSeq platforms. *The*  
577 *ISME journal*, 6(8), 1621-1624.
- 578 Chase, J.M., Kraft, N.J., Smith, K.G., Vellend, M., Inouye, B.D. (2011). Using null models to disentangle  
579 variation in community dissimilarity from variation in  $\alpha$  - diversity. *Ecosphere*, 2(2), 1-11.
- 580 Cleveland, W.S., Grosse, E. (1991). Computational methods for local regression. *Statistics and computing*,  
581 1(1), 47-62.
- 582 Deng, Y., Jiang, Y.-H., Yang, Y., He, Z., Luo, F., Zhou, J. (2012). Molecular ecological network analyses. *BMC*  
583 *Bioinformatics*, 13(1), 113.
- 584 DeSantis, T.Z., Hugenholtz, P., Larsen, N., Rojas, M., Brodie, E.L., Keller, K., Huber, T., Dalevi, D., Hu, P.,  
585 Andersen, G.L. (2006). Greengenes, a chimera-checked 16S rRNA gene database and  
586 workbench compatible with ARB. *Applied Environmental Microbiology*, 72(7), 5069-5072.
- 587 Dini-Andreote, F., de Cassia Pereira e Silva, M., Triado-Margarit, X., Casamayor, E.O., van Elsas, J.D., Salles,  
588 J.F. (2014). Dynamics of bacterial community succession in a salt marsh chronosequence:  
589 evidences for temporal niche partitioning. *The ISME Journal*, 8(10), 1989-2001.
- 590 Dini-Andreote, F., Stegen, J.C., van Elsas, J.D., Salles, J.F. (2015). Disentangling mechanisms that mediate  
591 the balance between stochastic and deterministic processes in microbial succession.  
592 *Proceedings of the National Academy of Sciences of the United States of America*, 112(11),  
593 E1326-E1332.
- 594 Edgar, R.C., Flyvbjerg, H. (2015). Error filtering, pair assembly and error correction for next-generation  
595 sequencing reads. *Bioinformatics*, 31(21), 3476-3482.
- 596 Edgar, R.C., Haas, B.J., Clemente, J.C., Quince, C., Knight, R. (2011). UCHIME improves sensitivity and  
597 speed of chimera detection. *Bioinformatics*, 27(16), 2194-2200.
- 598 Erdős, P., Rényi, A. (1960). On the evolution of random graphs. *Publ. Math. Inst. Hung. Acad. Sci*, 5(1),  
599 17-60.
- 600 Evans, S.E., Wallenstein, M.D. (2014). Climate change alters ecological strategies of soil bacteria. *Ecol*  
601 *Lett*, 17(2), 155-164.
- 602 Feng, Y.Z., Guo, Z.Y., Zhong, L.H., Zhao, F., Zhang, J.B., Lin, X.G. (2017). Balanced fertilization decreases  
603 environmental filtering on soil bacterial community assemblage in north China. *Front microbiol*,  
604 8(12).
- 605 Frouz, J., 2013. *Soil biota and ecosystem development in post mining sites*. CRC Press.
- 606 Frouz, J., Keplin, B., Pižl, V., Tajovský, K., Starý, J., Lukešová, A., Nováková, A., Balík, V.r., Háněl, L., Materna,  
607 J. (2001). Soil biota and upper soil layer development in two contrasting post-mining  
608 chronosequences. *Ecological Engineering*, 17(2-3), 275-284.

- 609 Frouz, J., Nováková, A. (2005). Development of soil microbial properties in topsoil layer during  
610 spontaneous succession in heaps after brown coal mining in relation to humus microstructure  
611 development. *Geoderma*, 129(1-2), 54-64.
- 612 Hanson, C.A., Fuhrman, J.A., Horner-Devine, M.C., Martiny, J.B. (2012). Beyond biogeographic patterns:  
613 processes shaping the microbial landscape. *Nature Reviews Microbiology*, 10(7), 497.
- 614 Harantová, L., Mudrák, O., Kohout, P., Elhottová, D., Frouz, J., Baldrian, P. (2017). Development of  
615 microbial community during primary succession in areas degraded by mining activities. *Land  
616 Degradation & Development*, 28(8), 2574-2584.
- 617 Hibbing, M.E., Fuqua, C., Parsek, M.R., Peterson, S.B. (2010). Bacterial competition: surviving and  
618 thriving in the microbial jungle. *Nature Reviews. Microbiology*, 8(1), 15.
- 619 Li, W., Godzik, A. (2006). Cd-hit: a fast program for clustering and comparing large sets of protein or  
620 nucleotide sequences. *Bioinformatics*, 22(13), 1658-1659.
- 621 Losos, J.B. (2008). Phylogenetic niche conservatism, phylogenetic signal and the relationship between  
622 phylogenetic relatedness and ecological similarity among species. *Ecology letters*, 11(10), 995-  
623 1003.
- 624 Martiny, J.B., Eisen, J.A., Penn, K., Allison, S.D., Horner-Devine, M.C. (2011). Drivers of bacterial  $\beta$ -  
625 diversity depend on spatial scale. *Proceedings of the National Academy of Sciences*, 108(19),  
626 7850-7854.
- 627 Morriën, E., Hannula, S.E., Snoek, L.B., Helmsing, N.R., Zweers, H., De Hollander, M., Soto, R.L., Bouffaud,  
628 M.-L., Buée, M., Dimmers, W. (2017). Soil networks become more connected and take up more  
629 carbon as nature restoration progresses. *Nature Communications*, 8(14349).
- 630 Morris, B.E., Henneberger, R., Huber, H., Moissl-Eichinger, C. (2013). Microbial syntrophy: interaction for  
631 the common good. *FEMS Microbiology Reviews*, 37(3), 384-406.
- 632 Mudrak, O., Dolezal, J., Frouz, J. (2016). Initial species composition predicts the progress in the  
633 spontaneous succession on post-mining sites. *Ecological Engineering*, 95(665-670).
- 634 Navrátilová, D., Tláškalová, P., Kohout, P., Dřevojan, P., Fajmon, K., Chytrý, M., Baldrian, P. (2019).  
635 Diversity of fungi and bacteria in species-rich grasslands increases with plant diversity in shoots  
636 but not in roots and soil. *Fems Microbiology Ecology*, 95(1), fiy208-fiy208.
- 637 Newman, M.E. (2006). Modularity and community structure in networks. *P Natl Acad Sic USA*, 103(23),  
638 8577-8582.
- 639 Price, M.N., Dehal, P.S., Arkin, A.P. (2009). FastTree: computing large minimum evolution trees with  
640 profiles instead of a distance matrix. *Molecular Biology and Evolution*, 26(7), 1641-1650.
- 641 Sagova-Mareckova, M., Cermak, L., Novotna, J., Plhacova, K., Forstova, J., Kopecky, J. (2008). Innovative  
642 methods for soil DNA purification tested in soils with widely differing characteristics. *Applied  
643 and Environmental Microbiology*, 74(9), 2902-2907.
- 644 Stegen, J.C., Lin, X., Fredrickson, J.K., Chen, X., Kennedy, D.W., Murray, C.J., Rockhold, M.L., Konopka, A.  
645 (2013). Quantifying community assembly processes and identifying features that impose them.  
646 *The ISME journal*, 7(11), 2069.
- 647 Stegen, J.C., Lin, X., Fredrickson, J.K., Konopka, A.E. (2015). Estimating and mapping ecological processes  
648 influencing microbial community assembly. *Frontiers in microbiology*, 6(370).
- 649 Stegen, J.C., Lin, X., Konopka, A.E., Fredrickson, J.K. (2012). Stochastic and deterministic assembly  
650 processes in subsurface microbial communities. *ISME Journal*, 6(9), 1653.
- 651 Tian, J.Q., Qiao, Y.C., Wu, B., Chen, H., Li, W., Jiang, N., Zhang, X.L., Liu, X.Z. (2017). Ecological succession  
652 pattern of fungal community in soil along a retreating glacier. *Frontiers in microbiology*, 8(13).

- 653 Tripathi, B.M., Stegen, J.C., Kim, M., Dong, K., Adams, J.M., Lee, Y.K. (2018). Soil pH mediates the balance  
654 between stochastic and deterministic assembly of bacteria. *ISME Journal*, 12(4), 1072-1083.
- 655 Urbanova, M., Snajdr, J., Baldrian, P. (2015). Composition of fungal and bacterial communities in forest  
656 litter and soil is largely determined by dominant trees. *Soil Biology and Biochemistry*, 84(53-64).
- 657 Violle, C., Nemergut, D.R., Pu, Z., Jiang, L. (2011). Phylogenetic limiting similarity and competitive  
658 exclusion. *Ecology letters*, 14(8), 782-787.
- 659 Wang, Y., Li, C., Kou, Y., Wang, J., Tu, B., Li, H., Li, X., Wang, C., Yao, M. (2017). Soil pH is a major driver  
660 of soil diazotrophic community assembly in Qinghai-Tibet alpine meadows. *Soil Biology and*  
661 *Biochemistry*, 115(547-555).
- 662 Webb, C.O., Ackerly, D.D., McPeck, M.A., Donoghue, M.J. (2002). Phylogenies and community ecology.  
663 *Annu Rev Ecol Syst*, 33(1), 475-505.
- 664 Yan, Q., Li, J., Yu, Y., Wang, J., He, Z., Van Nostrand, J.D., Kempfer, M.L., Wu, L., Wang, Y., Liao, L., Li, X.,  
665 Wu, S., Ni, J., Wang, C., Zhou, J. (2016). Environmental filtering decreases with fish  
666 development for the assembly of gut microbiota. *Environmental Microbiology*, 18(12), 4739-  
667 4754.
- 668 Zelezniak, A., Andrejev, S., Ponomarova, O., Mende, D.R., Bork, P., Patil, K.R. (2015). Metabolic  
669 dependencies drive species co-occurrence in diverse microbial communities. *P Natl Acad Sci*  
670 *USA*, 112(20), 6449-6454.
- 671 Zifcakova, L., Vetrovsky, T., Howe, A., Baldrian, P. (2016). Microbial activity in forest soil reflects the  
672 changes in ecosystem properties between summer and winter. *Environmental Microbiology*,  
673 18(1), 288-301.

674

675

676

677

678

679

680

681

682

683

684

685

686 **Table 1.** Criteria and definitions for patterns and ecological processes underlying  
 687 community phylogenetic structures and turnover, respectively (Webb et al., 2002;  
 688 Stegen et al., 2012; Stegen et al., 2013; Stegen et al., 2015).

| <i>Phylogenetic structure for a local (single) community</i>         | <b>Criteria</b>                                         | <b>Assembly patterns</b>    | <b>Definitions</b>                                                                                                                                                                                                   |
|----------------------------------------------------------------------|---------------------------------------------------------|-----------------------------|----------------------------------------------------------------------------------------------------------------------------------------------------------------------------------------------------------------------|
|                                                                      | NTI > +2                                                | Phylogenetic clustering     | Species in a local community are more closely related than null model expectation.                                                                                                                                   |
|                                                                      | NTI  < 2                                                | Stochastic processes        | Phylogenetic relatedness among species in a local community do not differ significantly from null model expectation.                                                                                                 |
|                                                                      | NTI < -2                                                | Phylogenetic overdispersion | Species in a local community are more distantly related than null model expectation.                                                                                                                                 |
| <i>Phylogenetic turnover between regional (pairwise) communities</i> | <b>Criteria</b>                                         | <b>Ecological processes</b> | <b>Definitions</b>                                                                                                                                                                                                   |
|                                                                      | $\beta$ NTI > +2                                        | Variable selection          | Caused by heterogeneous environmental conditions, deterministically leading regional communities toward more dissimilarity.                                                                                          |
|                                                                      | $ \beta$ NTI  < 2 and $RC_{\text{bray}} > +0.95$        | Dispersal limitation        | Caused by the restriction of taxa movement to or/and establishment in a new location, usually acting with ecological drift to result in more dissimilarity between regional communities.                             |
|                                                                      | $ \beta$ NTI  < 2 and $ \beta RC_{\text{bray}}  < 0.95$ | Undominated                 | Caused by ecological drift (e.g. random changes in species relative abundance) or other stochastic processes, signifying a scenario that neither selection nor dispersal primarily determine the community turnover. |
|                                                                      | $ \beta$ NTI  < 2 and $RC_{\text{bray}} < -0.95$        | Homogenizing dispersal      | Caused by very high dispersal rates, overwhelming other processes and leading toward very few variations between regional communities.                                                                               |
|                                                                      | $\beta$ NTI < -2                                        | Homogeneous selection       | Caused by homogeneous environmental conditions, deterministically leading regional communities toward more similarity.                                                                                               |

689

690

691

692

693

694

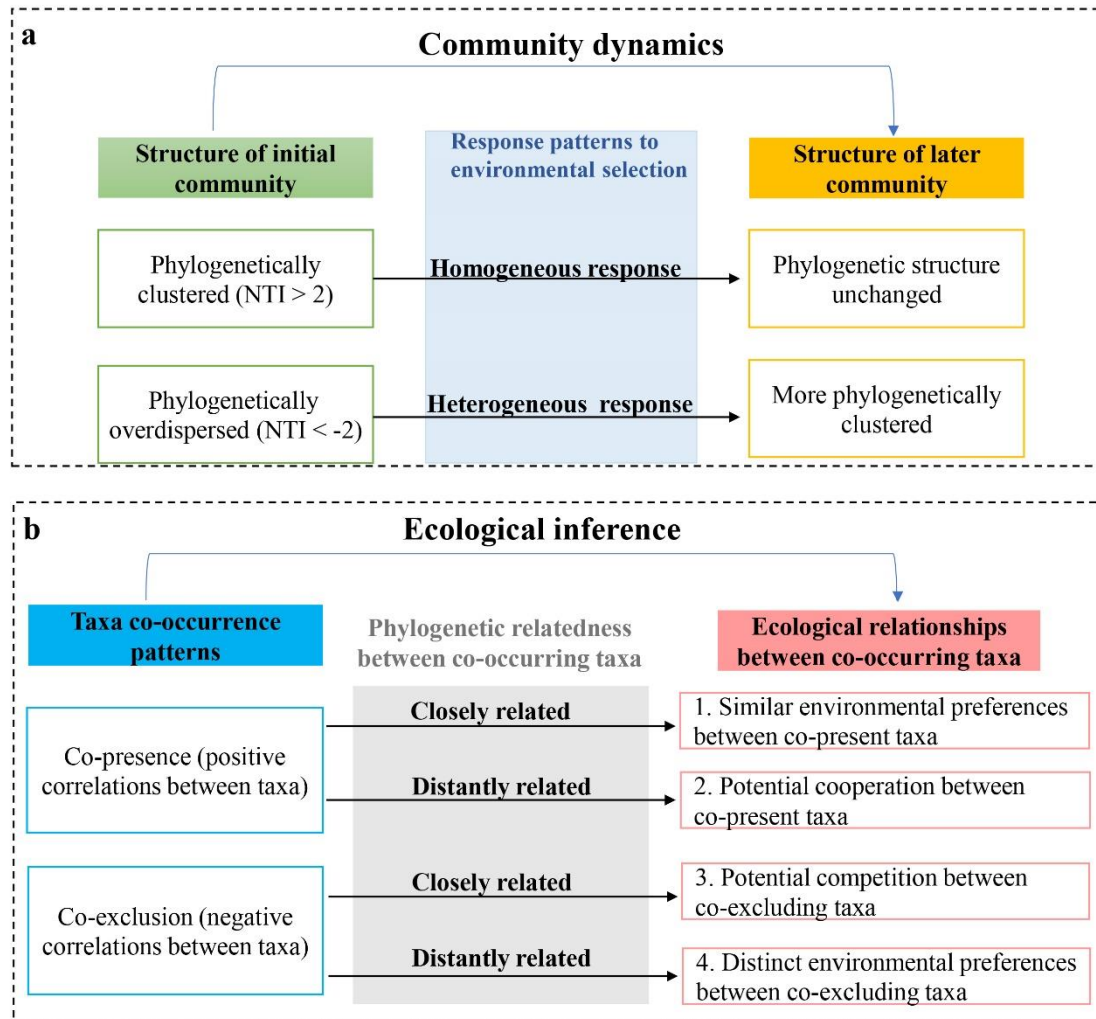

**Fig. 1** Conceptual models in elucidating microbial community dynamics (a) and taxa co-occurrence (b) separately. The model (a) uses the phylogenetic structure of the initial community to predict the structure of the later community, namely community dynamics. If the initial community is phylogenetically overdispersed (nearest taxon index (NTI) < -2), this initial community is predicted to show heterogeneous responses to the environmental selection, so that the later community is expected to become more phylogenetically clustered than the initial community. If the initial community is phylogenetically clustered (NTI > 2), this initial community is predicted to show a homogeneous response to the environmental selection, so that the phylogenetic structure of the later community is expected to keep relatively stable as the initial community. The model (b) integrates taxa co-occurrence patterns and phylogenetic relatedness between the co-occurring taxa to differentiate ecological inferences from taxa co-occurrence. Taxa co-presence and co-exclusion are separately based on positive and negative correlations between taxa in a network. Taxa phylogenetic relatedness is evaluated by phylogenetic distance between co-occurring taxa.



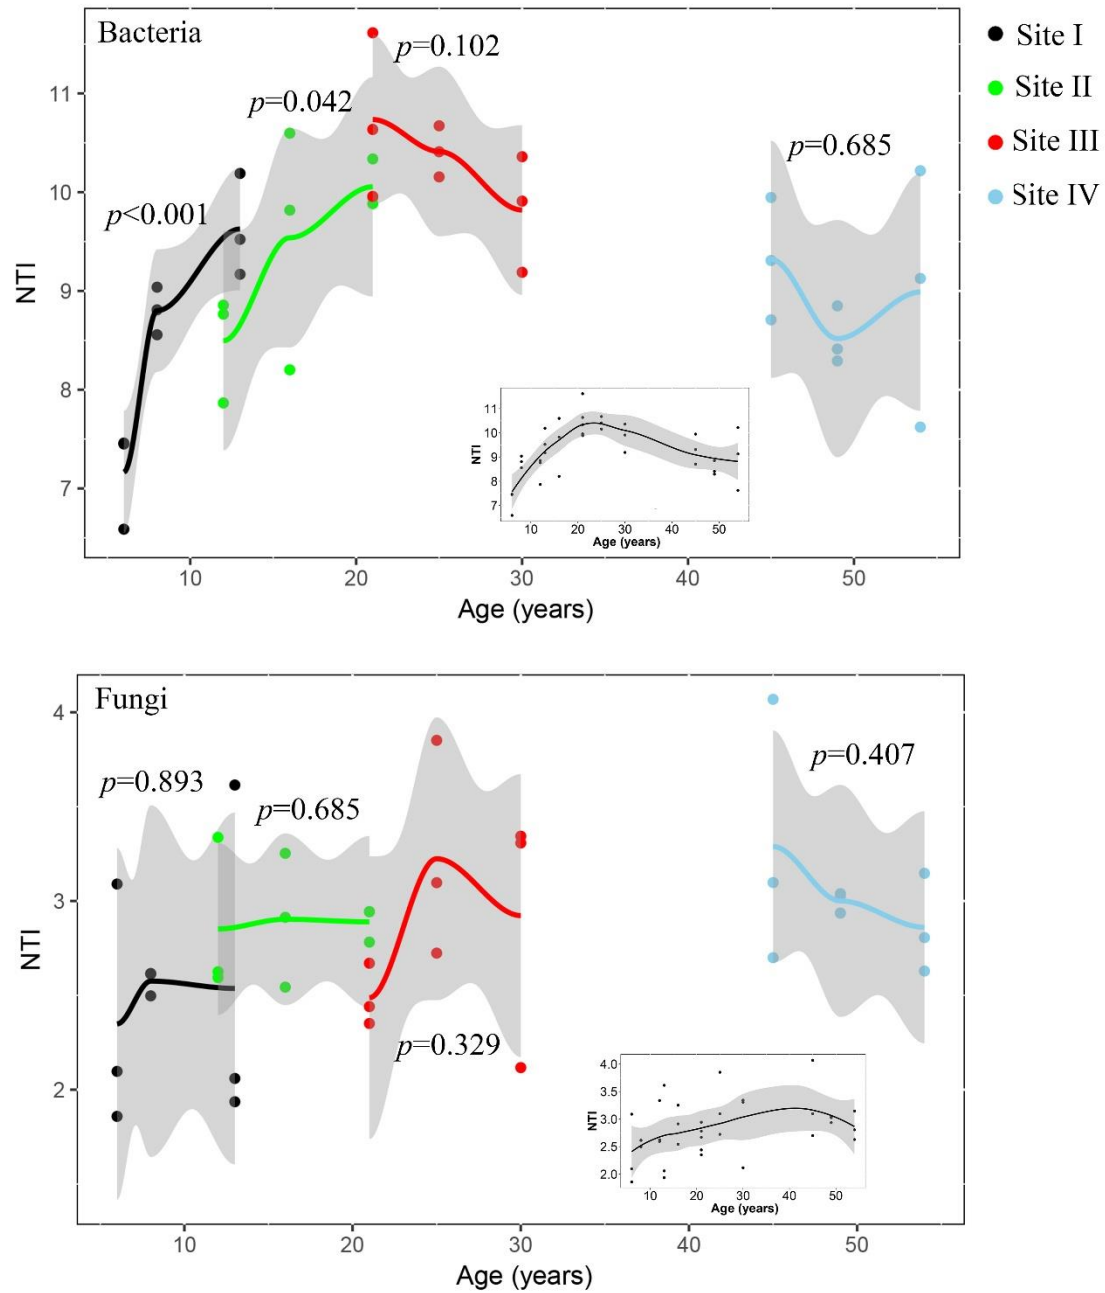

**Fig. 2** Distribution of NTI values at different sites across the chronosequence, and all sites (embedded). *P*-values of spearman's correlations between ages and NTI values at different sites are shown. The method of the regression is "loess". Grey shadow represents 95% confidence intervals.

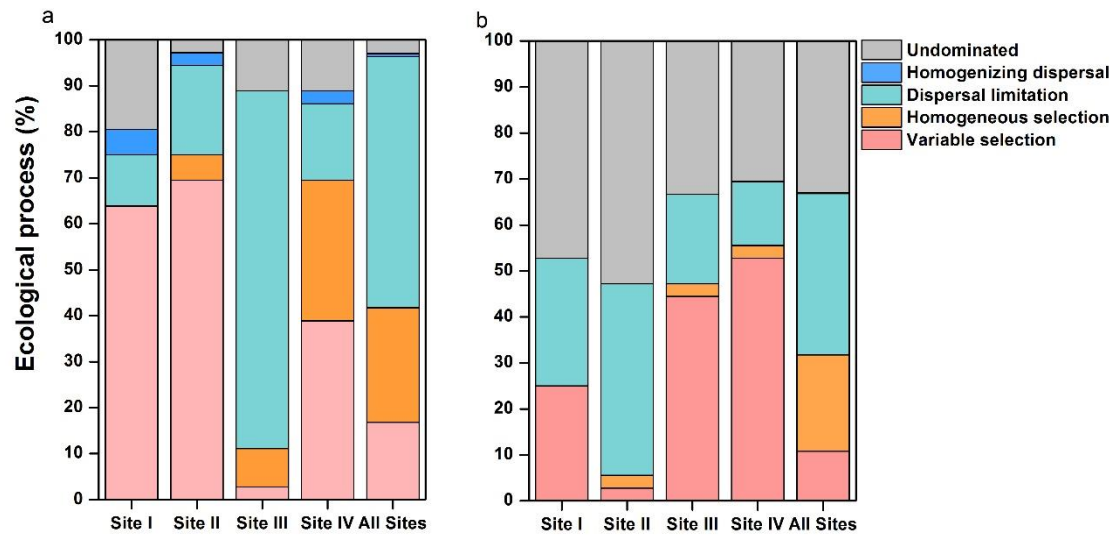

**Fig. 3** Relative contributions of different ecological processes to bacterial (a) and fungal (b) community turnover at different sites across the soil chronosequence. All Sites: including the community turnover between sites and within sites.

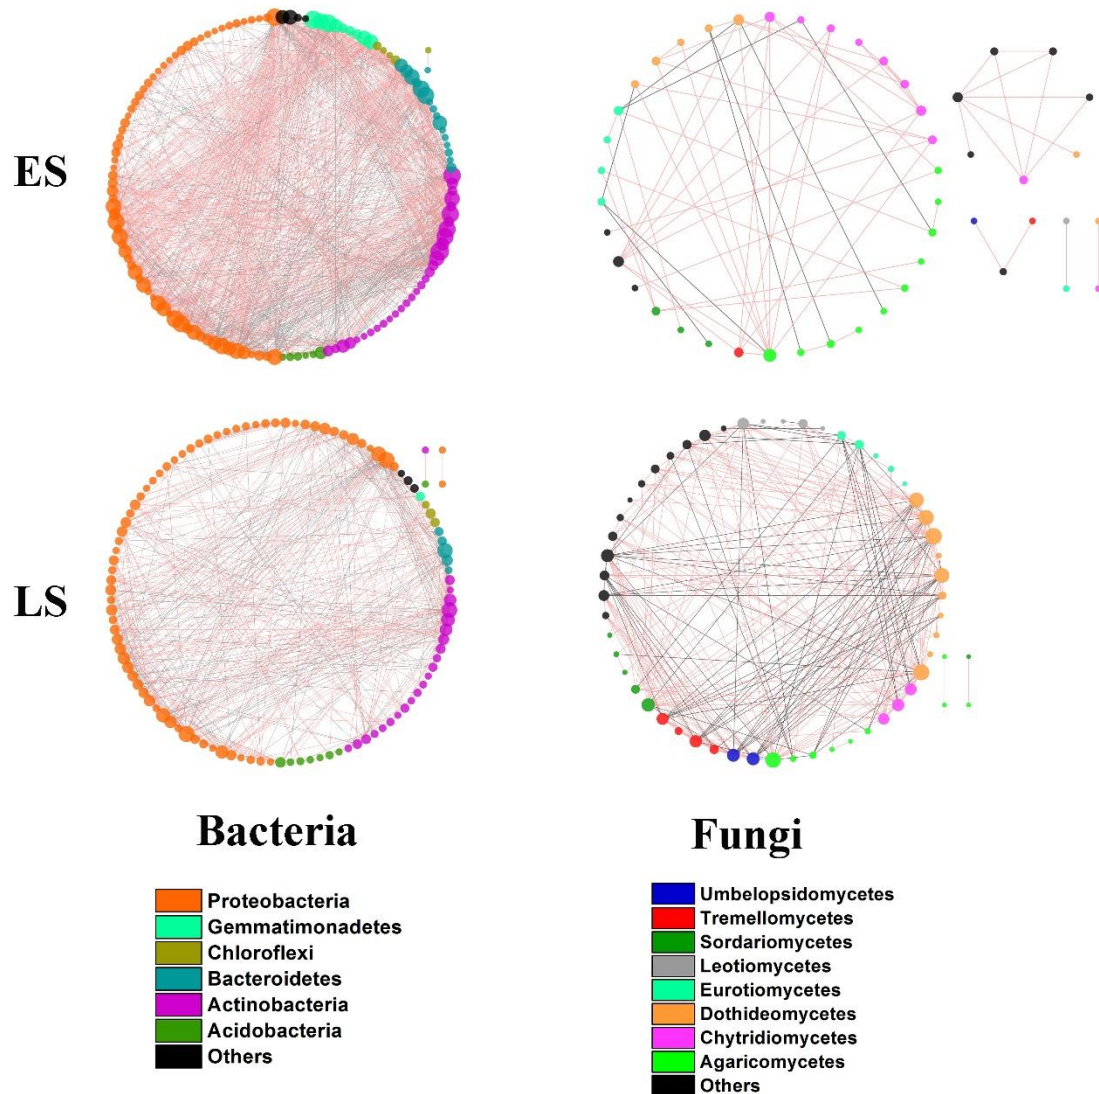

**Fig. 4** Co-occurrence networks of bacterial and fungal taxa, respectively. The nodes are sized by node degree (number of connections to a node), and colored by bacterial phyla and fungal classes, respectively. Positive and negative connections are colored by red and grey, respectively. ES: early successional stages including Site I and II; LS: later successional stages including Site III and IV.

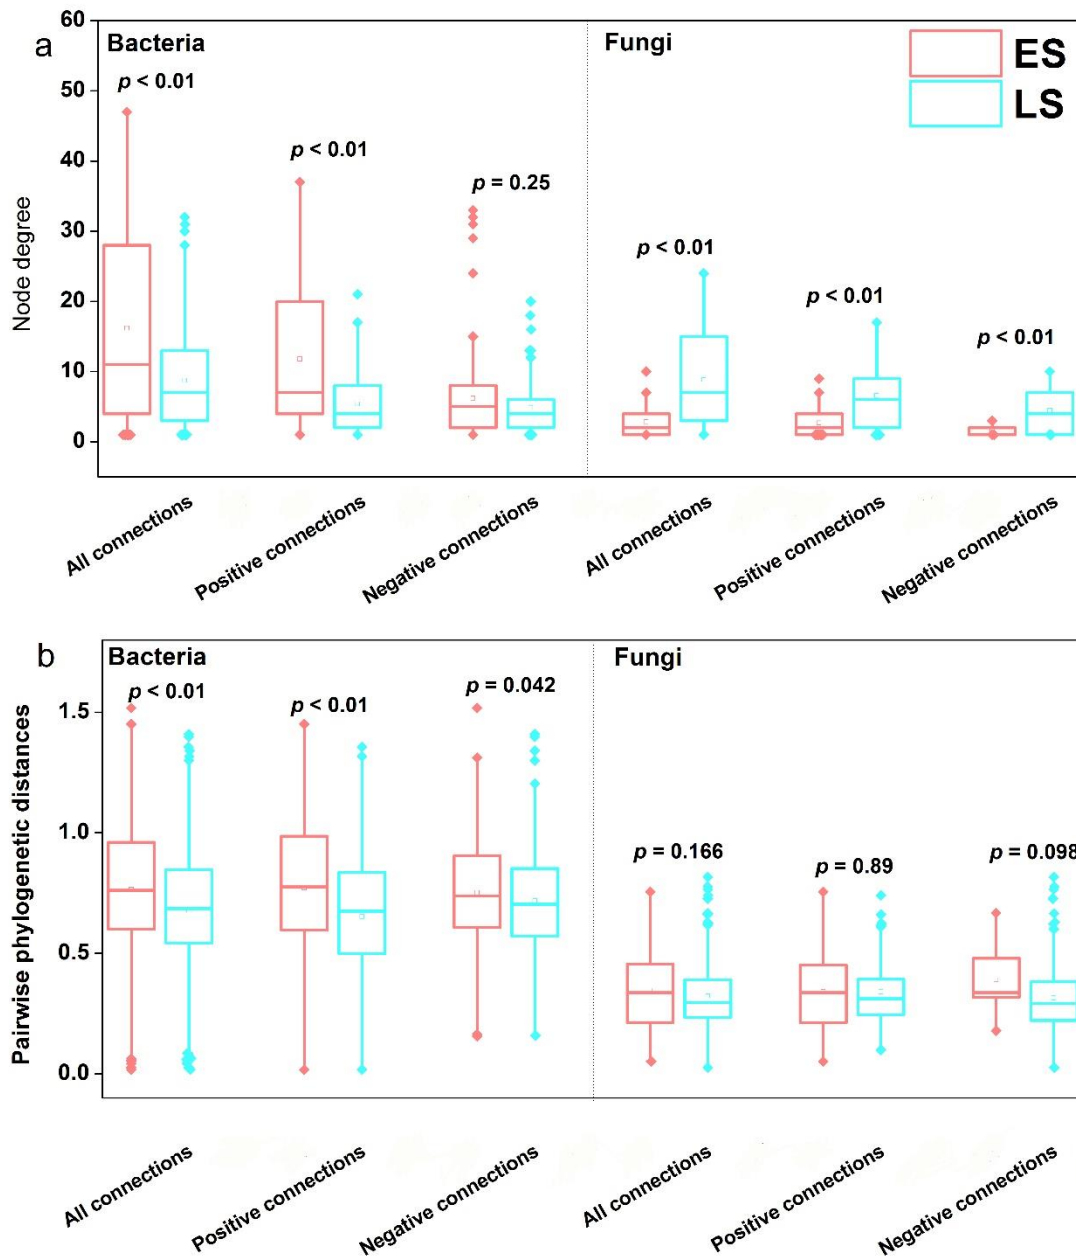

**Fig. 5** Node degree (a) and pairwise phylogenetic distances between connecting nodes (b) in bacterial and fungal networks. All connections: the network consisting of all connections (edges); positive connections: the sub-network consisting of only positive connections; negative connections: the sub-network consisting of only negative connections. The *P*-value is shown for the statistical significance in each pairwise comparison based on Wilcoxon rank sum test. The square and line inside the box represent the mean and median, respectively. ES: early successional stages including Site I and II; LS: later successional stages including Site III and IV.
